# Supplementary material
Source: PubMed Central journal article supplement (PMC3525523)
Supplement: NIHMS399756-supplement-03.pdf [file NIHMS399756-supplement-03.pdf]

Table S3. Recombination Rates for Individual Autosomal Chromosomes and Arms\*, Related to Figure 3

| chr | p mean | p std | q mean | q std | t mean | t std |
|-----|--------|-------|--------|-------|--------|-------|
| 1   | 0.92   | 0.65  | 0.81   | 0.59  | 1.74   | 0.92  |
| 2   | 0.66   | 0.62  | 0.95   | 0.78  | 1.60   | 0.99  |
| 3   | 0.75   | 0.69  | 0.64   | 0.57  | 1.38   | 0.85  |
| 4   | 0.41   | 0.49  | 0.78   | 0.57  | 1.19   | 0.77  |
| 5   | 0.46   | 0.50  | 0.76   | 0.64  | 1.22   | 0.83  |
| 6   | 0.47   | 0.54  | 0.51   | 0.57  | 0.98   | 0.77  |
| 7   | 0.55   | 0.54  | 0.73   | 0.58  | 1.27   | 0.90  |
| 8   | 0.57   | 0.62  | 0.46   | 0.52  | 1.03   | 0.85  |
| 9   | 0.49   | 0.50  | 0.51   | 0.55  | 1.00   | 0.68  |
| 10  | 0.58   | 0.50  | 0.52   | 0.58  | 1.10   | 0.75  |
| 11  | 0.37   | 0.49  | 0.64   | 0.55  | 1.01   | 0.77  |
| 12  | 0.51   | 0.50  | 0.64   | 0.62  | 1.14   | 0.78  |
| 13  | 0.00   | 0.00  | 0.96   | 0.70  | 0.96   | 0.70  |
| 14  | 0.00   | 0.00  | 0.85   | 0.65  | 0.85   | 0.65  |
| 15  | 0.00   | 0.00  | 0.99   | 0.72  | 0.99   | 0.72  |
| 16  | 0.47   | 0.50  | 0.31   | 0.46  | 0.78   | 0.73  |
| 17  | 0.53   | 0.50  | 0.52   | 0.50  | 1.04   | 0.71  |
| 18  | 0.34   | 0.48  | 0.47   | 0.52  | 0.81   | 0.73  |
| 19  | 0.42   | 0.50  | 0.45   | 0.50  | 0.87   | 0.69  |
| 20  | 0.38   | 0.49  | 0.47   | 0.50  | 0.86   | 0.72  |
| 21  | 0.00   | 0.00  | 0.49   | 0.52  | 0.49   | 0.52  |
| 22  | 0.00   | 0.00  | 0.47   | 0.52  | 0.48   | 0.52  |

\*p, q and t correspond to p-arm, q-arm and whole chromosome. Mean and standard deviation (std) values are shown.
